# Indexes of Insulin Resistance and Secretion in Obese Children and Adolescents

## A validation study

LOUISE S. CONWELL, MBBS, FRACP<sup>1</sup>  
STEWART G. TROST, PHD<sup>2</sup>

WENDY J. BROWN, PHD<sup>3</sup>  
JENNIFER A. BATCH, MBBS, FRACP, MD<sup>1</sup>

**OBJECTIVE** — To assess the concurrent validity of fasting indexes of insulin sensitivity and secretion in obese prepubertal (Tanner stage 1) children and pubertal (Tanner stages 2–5) adolescents using estimates from the modified minimal model frequently sampled intravenous glucose tolerance test (FSIVGTT) as a criterion measure.

**RESEARCH DESIGN AND METHODS** — Eighteen obese children and adolescents (11 girls and 7 boys, mean age  $12.2 \pm 2.4$  years, mean BMI  $35.4 \pm 6.2$  kg/m<sup>2</sup>, mean BMI-SDS  $3.5 \pm 0.5$ , 7 prepubertal and 11 pubertal) participated in the study. All participants underwent an insulin-modified FSIVGTT on two occasions, and 15 repeated this test a third time (mean 12.9 and 12.0 weeks apart).  $S_i$  measured by the FSIVGTT was compared with homeostasis model assessment (HOMA) of insulin resistance (HOMA-IR), quantitative insulin-sensitivity check index (QUICKI), fasting glucose-to-insulin ratio (FGIR), and fasting insulin (estimates of insulin sensitivity derived from fasting samples). The acute insulin response (AIR) measured by the FSIVGTT was compared with HOMA of percent  $\beta$ -cell function (HOMA- $\beta\%$ ), FGIR, and fasting insulin (estimates of insulin secretion derived from fasting samples).

**RESULTS** — There was a significant negative correlation between HOMA-IR and  $S_i$  ( $r = -0.89$ ,  $r = -0.90$ , and  $r = -0.81$ ,  $P < 0.01$ ) and a significant positive correlation between QUICKI and  $S_i$  ( $r = 0.89$ ,  $r = 0.90$ , and  $r = 0.81$ ,  $P < 0.01$ ) at each time point. There was a significant positive correlation between FGIR and  $S_i$  ( $r = 0.91$ ,  $r = 0.91$ , and  $r = 0.82$ ,  $P < 0.01$ ) and a significant negative correlation between fasting insulin and  $S_i$  ( $r = -0.90$ ,  $r = -0.90$ , and  $r = -0.88$ ,  $P < 0.01$ ). HOMA- $\beta\%$  was not as strongly correlated with AIR ( $r = 0.60$ ,  $r = 0.54$ , and  $r = 0.61$ ,  $P < 0.05$ ).

**CONCLUSIONS** — HOMA-IR, QUICKI, FGIR, and fasting insulin correlate strongly with  $S_i$  assessed by the FSIVGTT in obese children and adolescents. Correlations between HOMA- $\beta\%$ , FGIR and fasting insulin, and AIR were not as strong. Indexes derived from fasting samples are a valid tool for assessing insulin sensitivity in prepubertal and pubertal obese children.

*Diabetes Care* 27:314–319, 2004

The global increase in obesity in children and adolescents heightens the risk of insulin resistance and type 2 diabetes (1). Insulin resistance is pro-

posed to have a pivotal role in the development of the metabolic syndrome ("Syndrome X") (2). Furthermore, clustering of cardiovascular risk factors is seen

in children and adolescents with the highest degree of insulin resistance, suggesting that adult cardiovascular disease is more likely to develop in these young people (3,4). Hence, valid and reliable methods to measure insulin sensitivity in this at-risk population are essential to assess the presence and extent of insulin resistance, associated factors, progression over time, and the effect of pharmacological and lifestyle interventions.

The modified minimal model frequently sampled intravenous glucose tolerance test (FSIVGTT) is a method that assesses insulin sensitivity by a computed mathematical analysis of glucose and insulin dynamics after a bolus of intravenous glucose, followed 20 min later by a bolus of intravenous insulin or Tolbutamide. It is an accurate and valid technique for the measurement of insulin sensitivity in adults, adolescents, and children (5–8). This method has been used in studies assessing insulin sensitivity in young people (9). However, like the hyperinsulinemic-euglycemic clamp technique, it is time-consuming, invasive, expensive, labor intensive, requires experienced personnel, and is technically difficult to perform in obese young people.

In contrast, the homeostasis model assessment (HOMA) for insulin resistance (HOMA-IR) and the quantitative insulin-sensitivity check index (QUICKI) derive estimates of insulin sensitivity from the mathematical modeling of fasting plasma glucose and insulin concentrations. The fasting glucose-to-insulin ratio (FGIR) has also been proposed as a useful estimate of insulin sensitivity (10). However, validation studies of these derived indexes in pediatric populations are scarce. Uwaifo et al. (11) assessed the correlation between fasting and clamp-derived indexes of insulin secretion, sensitivity, and clearance in a cohort of normal and overweight children aged 6–12 years. Both QUICKI ( $r = 0.67$ – $0.69$ ) and HOMA-IR ( $r = -0.51$  to  $-0.56$ ) correlated signifi-

From the <sup>1</sup>Department of Endocrinology and Diabetes, Royal Children's Hospital, Herston, Brisbane, Queensland, Australia; the <sup>2</sup>Department of Kinesiology and Community Health Institute, Kansas State University, Manhattan, Kansas; and the <sup>3</sup>School of Human Movement Studies, University of Queensland, St. Lucia, Brisbane, Queensland, Australia.

Address correspondence and reprint requests to Louise S. Conwell, MBBS, FRACP, Royal Children's Hospital Foundation Clinical Research Fellow, Department of Endocrinology and Diabetes, Royal Children's Hospital, Herston, Brisbane, Queensland, Australia, 4029. E-mail: louise\_conwell@health.qld.gov.au.

Received for publication 24 June 2003 and accepted in revised form 4 November 2003.

**Abbreviations:** AIR, acute insulin response; FGIR, fasting glucose-to-insulin ratio; FSIVGTT, frequently sampled intravenous glucose tolerance test; HOMA, homeostasis model assessment; HOMA- $\beta\%$ , HOMA of percent  $\beta$ -cell function; HOMA-IR, HOMA of insulin resistance; QUICKI, quantitative insulin-sensitivity check index.

© 2004 by the American Diabetes Association.

cantly with the clamp-derived measures, supporting the utility of both indexes in pediatric patients. Huang et al. (12) quantified the relationship between HOMA-IR and insulin sensitivity (from Tolbutamide-modified FSIVGTT) in 156 white and African-American children (mean age  $9.7 \pm 1.8$  years). HOMA-IR was strongly correlated with FSIVGTT-measured insulin sensitivity, explaining 63.4% of the variance. The validity of QUICKI was not examined. While the results of these studies support the potential utility of derived indexes of insulin sensitivity in the general pediatric population, our understanding regarding the validity of derived indexes of insulin sensitivity in overweight and obese young people is less than complete. Indeed, no previous study has simultaneously evaluated the validity of the HOMA-IR and QUICKI in a cohort of exclusively obese children and adolescents. Therefore, the aim of this study was to assess the validity of derived indexes of insulin sensitivity and secretion using the modified (insulin) minimal model as a criterion measure in a cohort of obese prepubertal children and pubertal adolescents.

## RESEARCH DESIGN AND METHODS

**Eighteen obese children and adolescents** (aged 8–18 years, 7 prepubertal and 11 pubertal) were recruited to participate in the study. Obesity was defined as a BMI equal to or greater than the age- and sex-specific cut-points proposed by the International Obesity Task Force (13). The study was approved by the Royal Children's Hospital and Health Services District, Brisbane, and the University of Queensland ethics committees. Parents provided informed consent and children and adolescents provided informed assent before testing commenced.

### Assessment of anthropometry and pubertal status

Weight was measured in light indoor clothing using a calibrated electronic scale (Tanita BWB-600; Wedderburn Scales, Brisbane, Australia). Height was measured using a calibrated wall-mounted Stadiometer (Holtain Instruments, Crymmych, U.K.). BMI was calculated by dividing the weight of the subject by the height squared ( $\text{kg}/\text{m}^2$ ). BMI-SDS was calculated by the "LMS" method using 1990 British growth refer-

ence centiles (14). In the absence of available national data, this population was thought to be the most comparable, and this comparison has been made in a previous Australian study (15). Waist circumference was measured to the nearest 0.1 cm (16). Pubertal development stage was assessed by a single pediatric endocrinologist using the criteria of Marshall and Tanner (17,18).

### Insulin-modified FSIVGTT

An insulin-modified FSIVGTT was performed on three occasions (time 1, 2, and 3) in the Day Procedure Unit of the Royal Children's Hospital. Test 2 was conducted  $12.9 \pm 2.6$  (means  $\pm$  SD) weeks after test 1, and test 3 was conducted  $12.0 \pm 2.4$  weeks after test 2. Consumption of only water was permitted after 2200 the evening before testing. Following topical anesthetic (EMLA cream; AstraZeneca) application to the antecubital space of both arms, flexible indwelling intravenous catheters were inserted into one or both antecubital veins. Where available, one catheter was used for administration of glucose and insulin, and the other was used for drawing blood samples. Catheters were maintained patent with a slow 0.9% saline infusion. If only one intravenous catheter could be inserted (18 of 51 occasions), a bolus of 0.9% saline (minimum 5 ml) was administered to ensure sufficient flushing between administration of glucose or insulin and blood sample collection. Three samples for fasting glucose and insulin were obtained at times  $-20$ ,  $-10$ , and  $0$  min. Glucose ( $0.3 \text{ g}/\text{kg}$ ) as 25% dextrose was administered intravenously over a 1-min period at time  $0$  min. Intravenous insulin  $0.03 \text{ U}/\text{kg}$  (Humulin Regular; Eli Lilly) was administered at time  $20$  min. Sufficient saline flush was used to ensure total delivery of the glucose and insulin doses. Blood samples (3 ml) were collected at times  $0, 2, 3, 4, 5, 6, 8, 10, 12, 14, 16, 19, 22, 23, 24, 25, 27, 30, 35, 40, 50, 60, 70, 80, 90, 100, 120, 140, 160$ , and  $180$  min (relative to glucose administration), i.e., standard time points for 3 h after glucose injection. Blood was collected in chilled tubes containing lithium heparin. Plasma glucose was measured immediately using a Hitachi DDP automated analyzer (Tokyo, Japan) with an interassay coefficient of variation of 1.7%. Plasma samples for insulin were stored at  $-70^\circ\text{C}$  and measured later using the IMx

Microparticle Enzyme Immunoassay technology (Abbott, Tokyo, Japan). There is nil detectable cross-reactivity of this assay with C-peptide and 0.005% cross-reactivity with proinsulin. The mean inter- and intra-assay coefficients of variation were 4.5 and 4.0%, respectively. Glucose and insulin values were entered into the MINMOD computer program (version 3.0, Richard N. Bergman, 1994) for determination of  $S_i$  and acute insulin response (AIR) (an estimate of insulin secretory capacity) (19).

### Derived indexes from fasting blood samples

The means of the fasting glucose and insulin samples collected at  $-20$ ,  $-10$ , and  $0$  min were used in the calculations. The HOMA-IR, QUICKI, and FGIR were derived as estimates of insulin sensitivity. HOMA-IR was calculated using the formula fasting insulin ( $\mu\text{U}/\text{ml}$ )  $\times$  fasting glucose ( $\text{mmol}/\text{l}$ )/22.5 assuming that normal young subjects have an insulin resistance of 1 (20). QUICKI was calculated as  $1/(\log \text{fasting insulin } [\mu\text{U}/\text{ml}] + \log \text{glucose } [\text{mg}/\text{dl}])$  (21). HOMA of percent  $\beta$ -cell function (HOMA- $\beta\%$ ) was calculated as  $20 \times \text{fasting insulin } (\mu\text{U}/\text{ml})/(\text{fasting glucose } [\text{mmol}/\text{l}] - 3.5)$  assuming that normal young adults have 100%  $\beta$ -cell function (20). FGIR was calculated as fasting glucose ( $\text{mg}/\text{dl}$ )/fasting insulin ( $\mu\text{U}/\text{ml}$ ).

### Statistical analysis

Analysis was performed using SPSS version 11.0 software for Windows (LEAD Technologies, 2001). Data are reported as means  $\pm$  SD (range). Due to the skewed nature of the indexes, validity was evaluated using Spearman correlation coefficients.  $P < 0.05$  was considered significant for all the data analyses.

**RESULTS**—Eighteen caucasian children and adolescents (7 prepubertal and 11 pubertal) were studied. Baseline demographic characteristics and anthropometric measurements are shown in Table 1. The mean  $\pm$  SD age was  $12.2 \pm 2.4$ , range 8.3–16.9 years, BMI  $35.4 \pm 6.2 \text{ kg}/\text{m}^2$ , and BMI-SDS  $3.5 \pm 0.5$ . There was no history of gestational diabetes in the mothers of the participants and only one participant had a first-degree relative with type 2 diabetes.

Fasting indexes and the minimal model-derived measurements of  $S_i$  and

Table 1—Physical characteristics of the subjects

|                                                          |                           |
|----------------------------------------------------------|---------------------------|
| N                                                        | 18                        |
| Sex (F/M)                                                | 11/7                      |
| Pubertal status—female (Tanner 1/Tanner 2–3/ Tanner 4–5) | 1/5/5                     |
| Pubertal status—male (Tanner 1/Tanner 2–3/Tanner 4–5)    | 6/0/1                     |
| Age (years)                                              | 12.2 ± 2.4 (8.3–16.9)     |
| Height (cm)                                              | 154.5 ± 9.0 (141.0–171.1) |
| Weight (kg)                                              | 85.1 ± 20.2 (60.3–139.4)  |
| BMI (kg/m <sup>2</sup> )                                 | 35.4 ± 6.2 (29.5–51.5)    |
| BMI-SDS                                                  | 3.5 ± 0.5 (2.9–4.4)       |
| Waist circumference (cm)                                 | 108.9 ± 12.3 (92.0–144.0) |

Data are *n* or means ± SD (range).

secretion (AIR) for times 1, 2, and 3 are presented in Table 2. None of the participants had diabetes or impaired fasting glycemia based on fasting glucose measurements. Fasting insulin was >90 pmol/l (15 μU/ml) in 13 subjects.

The correlations between fasting and minimal model–derived indexes of insulin sensitivity and insulin secretion are shown in Table 3. There was a significant negative correlation between HOMA-IR and *S*<sub>i</sub> (*r* = −0.89, *r* = −0.90, and *r* = −0.81, all *P* values <0.01) and a significant positive correlation between QUICKI and *S*<sub>i</sub> (*r* = 0.89, *r* = 0.90, and *r* = 0.81, all *P* values <0.01) at each time point. The correlation coefficients for HOMA-IR and *S*<sub>i</sub> as well as QUICKI and *S*<sub>i</sub> were similar in magnitude for all three tests. There was a significant positive correlation between FGIR and *S*<sub>i</sub> (*r* = 0.91, *r* = 0.91, and *r* = 0.82, all *P* values <0.01) and a significant negative correlation between fasting insulin and *S*<sub>i</sub> (*r* = −0.90, *r* = −0.90, and *r* = −0.88, all *P* values <0.01). HOMA-β% was not as strongly correlated with AIR (*r* = 0.60, *r* = 0.54, and *r* = 0.61, *P* < 0.05). FGIR and fasting insulin were correlated with AIR negatively and positively, respec-

tively, with similar correlation coefficients to HOMA-β%.

**CONCLUSIONS**— The aim of this study was to assess the validity of fasting indexes of insulin sensitivity and secretion in obese children and adolescents with estimates from the modified (insulin) minimal model FSIVGTT. In this cohort, indexes of insulin sensitivity derived from fasting samples (HOMA-IR, QUICKI, FGIR, and fasting insulin) correlated strongly with *S*<sub>i</sub> derived from the FSIVGTT. The high degree of correlation was stable when assessed on two separate occasions for the entire cohort and on three separate occasions in 15 of the subjects. HOMA-β% as a derived estimate of insulin secretion from fasting samples was less strongly correlated with AIR measured by the FSIVGTT. FGIR and fasting insulin were correlated with AIR negatively and positively, respectively, with similar correlation coefficients.

Obesity and type 2 diabetes are globally increasing health problems for young people, with significant individual and public health ramifications with respect to associated morbidity and mortality (22–24). The importance of measuring

insulin resistance in this at-risk population has recently been highlighted (25). Measurement of insulin resistance is imperative to enhance understanding of its pathogenesis, progression, and complications, to facilitate assessment of prevention and intervention strategies, and to further investigate differences observed between population subgroups defined by ethnicity (26), sex (27,28), and pubertal stage (29). Establishing the validity of HOMA-IR and QUICKI to assess insulin sensitivity in obese children and adolescents is particularly important because the use of such indexes is simpler, cheaper, less labor intensive, less time-consuming, and more acceptable to young people than clamp studies or the FSIVGTT, especially if repeated measurements are needed. These simplified measures of insulin sensitivity may facilitate much needed clinical and epidemiological studies.

Previous studies have evaluated simple indexes for assessing insulin sensitivity in a wide range of conditions associated with insulin resistance, including pregnancy (30), renal dysfunction (31), aging (32), and the polycystic ovarian syndrome (33). In the original description of HOMA, this estimate of insulin resistance correlated well with estimates obtained by use of the euglycemic clamp in adults (*r* = 0.88, *P* < 0.0001) (20). In adult cohorts (both sexes) with differing glycemic status and normal or elevated blood pressure, HOMA-IR has been shown to significantly correlate with clamp-derived total glucose disposal (*r* values ranging between −0.70 and −0.83, *P* < 0.001) (34). In adults, insulin sensitivity estimated by QUICKI has been shown to significantly correlate with that measured by the glucose clamp (*r* = 0.78,

Table 2—Fasting- and FSIVGTT-derived measures of insulin sensitivity and β-cell secretory capacity

|                                                                     | Time 1                        | Time 2                        | Time 3                        |
|---------------------------------------------------------------------|-------------------------------|-------------------------------|-------------------------------|
| <i>n</i>                                                            | 18                            | 18                            | 15                            |
| Fasting glucose (mmol/l)                                            | 4.9 ± 0.3 (4.4–5.4)           | 4.9 ± 0.3 (4.4–5.2)           | 4.9 ± 0.3 (4.4–5.2)           |
| Fasting insulin (pmol/l)                                            | 152.8 ± 74.8 (58.0–312.6)     | 134.7 ± 82.8 (56.6–352.8)     | 119.8 ± 66.5 (41.6–294.4)     |
| FGIR (conventional units)                                           | 5.28 ± 2.76 (1.97–1.33)       | 4.64 ± 2.91 (1.89–11.76)      | 4.10 ± 2.21 (1.38–9.81)       |
| HOMA-IR                                                             | 5.48 ± 2.55 (2.11–10.65)      | 4.84 ± 2.93 (1.99–13.07)      | 4.34 ± 2.49 (1.55–10.90)      |
| QUICKI                                                              | 0.30 ± 0.02 (0.28–0.34)       | 0.31 ± 0.02 (0.27–0.34)       | 0.32 ± 0.02 (0.27–0.36)       |
| <i>S</i> <sub>i</sub> (10 <sup>−4</sup> min <sup>−1</sup> /(μU/ml)) | 1.4 ± 0.8 (0.3–3.1)           | 1.8 ± 1.1 (0.4–4.5)           | 2.0 ± 1.0 (0.5–4.2)           |
| AIR (μU/ml)                                                         | 1587.5 ± 636.5 (849.8–2992.5) | 1464.5 ± 629.9 (658.0–2727.7) | 1385.8 ± 583.3 (665.3–2495.0) |
| HOMA-β%                                                             | 399 ± 259 (135–947)           | 344 ± 238 (126–832)           | 298 ± 155 (90–654)            |

Data are means ± SD (range).

**Table 3—Correlation matrix of fasting indexes to FSIVGTT-derived indexes of insulin sensitivity and insulin secretion**

|                                    | $S_i$  | AIR    |
|------------------------------------|--------|--------|
| Combined measurements ( $n = 51$ ) |        |        |
| HOMA-IR                            | −0.89* | —      |
| QUICKI                             | 0.89*  | —      |
| FGIR                               | 0.91*  | −0.66* |
| Fasting insulin                    | −0.90* | 0.69*  |
| HOMA- $\beta$ %                    | —      | 0.60*  |
| Time 1 ( $n = 18$ )                |        |        |
| HOMA-IR                            | −0.89* | —      |
| QUICKI                             | 0.89*  | —      |
| FGIR                               | 0.91*  | −0.60* |
| Fasting insulin                    | −0.90* | 0.63*  |
| HOMA- $\beta$ %                    | —      | 0.53†  |
| Time 2 ( $n = 18$ )                |        |        |
| HOMA-IR                            | −0.90* | —      |
| QUICKI                             | 0.90*  | —      |
| FGIR                               | 0.91*  | −0.65* |
| Fasting insulin                    | −0.90* | 0.67*  |
| HOMA- $\beta$ %                    | —      | 0.58†  |
| Time 3 ( $n = 15$ )                |        |        |
| HOMA-IR                            | −0.81* | —      |
| QUICKI                             | 0.81*  | —      |
| FGIR                               | 0.82*  | −0.57† |
| Fasting insulin                    | −0.89* | 0.59†  |
| HOMA- $\beta$ %                    | —      | 0.61†  |

\*Significant at  $P < 0.01$ , †significant at  $P < 0.05$ .

$P < 0.001$ ) (21) ( $r = 0.84$ ,  $P < 0.001$ ) (35), the insulin-modified FSIVGTT ( $r = 0.59$ ,  $P < 0.001$ ) (21), and the insulin suppression test (nonobese:  $r = -0.49$ ,  $P < 0.001$ ; obese  $-0.61$ ,  $P < 0.001$ ) (35,36).

Few previous studies, however, have examined the validity of HOMA-IR and QUICKI in pediatric populations. In a study of prepubertal and pubertal obese children and adolescents, HOMA-IR and QUICKI were significantly correlated with indexes derived from the glycemic and insulinemic responses to an oral glucose tolerance test (37). In a cohort of prepubertal girls with premature adrenarche and/or obesity, FGIR and QUICKI were significantly correlated with OGTT measures of insulin sensitivity (38). Uwaifo et al. (11) reported significant correlations between HOMA-IR, QUICKI, and euglycemic-hyperinsulinemic clamp-derived indexes of insulin sensitivity ( $r = -0.51$  and  $r = 0.67$ , respectively). Huang et al. (12) reported HOMA-IR to account for 63.4% of the variance in insulin sensitivity measured by the Tolbutamide-modified FSIVGTT. Compared with these

previous studies, our study assessed an exclusively obese pediatric cohort with greater degrees of insulin resistance. Moreover, comparisons were made at three distinct points in time over a mean period of 25 weeks. At each time point, we found HOMA-IR ( $r = -0.81$  to  $-0.90$ ,  $P < 0.01$ ) and QUICKI ( $r = 0.81$ – $0.90$ ) to be significantly correlated with the insulin-modified FSIVGTT. Notably, these correlations are stronger than those reported by Uwaifo et al. (11), who used the euglycemic-hyperinsulinemic clamp as a criterion measure of insulin sensitivity.

This study had several limitations that warrant consideration. First, the subjects did not have an oral glucose tolerance test before participating in the study. In other populations, the utility of HOMA-IR compared with clamp-derived indexes of insulin resistance was decreased in patients with impaired glucose tolerance compared with normal glucose tolerance (32). However, the similarity of correlations of insulin to fasting glucose ratio and fasting insulin with  $S_i$  strongly suggests the young people in this study did not

progress to  $\beta$ -cell failure. Second, the relatively small and homogeneous sample of obese children and adolescents did not permit subgroup analyses based on race/ethnicity, sex, or maturational stage. Validation studies are needed in other population groups because differences in insulin sensitivity and compensatory insulin secretion have been demonstrated in children of different racial/ethnic backgrounds (27,28). Lastly, while the combination of hyperglycemic and hyperinsulinemic clamp studies is described as the traditional gold standard for quantifying the in vivo action, secretion, and disposal of insulin, insulin sensitivity assessed by Bergman's modified minimal model FSIVGTT has been shown to be strongly correlated with the euglycemic glucose clamp (8) and has been used as a criterion measure in other pediatric studies (9,39–43).

In summary, indexes of insulin sensitivity derived from fasting plasma glucose and insulin (HOMA-IR, QUICKI, FGIR, and fasting insulin) correlate strongly with  $S_i$  assessed by the FSIVGTT in this cohort of obese children and adolescents. HOMA- $\beta$ % (a derived index of insulin secretion), FGIR, and fasting insulin correlated less strongly with AIR. Consequently, indexes derived from fasting samples appear to be a valid tool for estimating insulin sensitivity in obese children and adolescents.

**Acknowledgments**—L.S.C. was supported by a Royal Children's Hospital Foundation (Brisbane, Australia) Clinical Research Fellowship. This research project was funded by a grant from the University of Queensland, St. Lucia, Australia, and an Australasian Pediatric Endocrine Group/Novo Nordisk Research Grant.

We acknowledge the advice of Dr. Wayne Cutfield and Dr. Paul Hoffman, Starship Children's Hospital, Auckland, New Zealand with reference to the FSIVGTT and MINMOD program. We also acknowledge the efforts of Luke Spence, Margit Kempf, and Anthony Smith, who assisted with sample collection and processing, and the nursing staff of the Day Procedure Unit at the Royal Children's Hospital, Brisbane, who were involved in the clinical care of the subjects during their inpatient visits. We especially acknowledge the children/adolescents and parents who participated in this study.



## References

- Rosenbloom AL, Joe JR, Young RS, Winter WE: Emerging epidemic of type 2 diabetes in youth. *Diabetes Care* 22:345–354, 1999
- Reaven G: Syndrome X. *Curr Treat Options Cardiovasc Med* 3:323–332, 2001
- Csabi G, Torok K, Jeges S, Molnar D: Presence of metabolic cardiovascular syndrome in obese children. *Eur J Pediatr* 159:91–94, 2000
- Chen W, Srinivasan SR, Elkasabany A, Berenson GS: Cardiovascular risk factors clustering features of insulin resistance syndrome (Syndrome X) in a biracial (Black-White) population of children, adolescents, and young adults: the Bogalusa Heart Study. *Am J Epidemiol* 150:667–674, 1999
- Finegood DT, Hramiak IM, Dupre J: A modified protocol for estimation of insulin sensitivity with the minimal model of glucose kinetics in patients with insulin-dependent diabetes. *J Clin Endocrinol Metab* 70:1538–1549, 1990
- Yang YJ, Youn JH, Bergman RN: Modified protocols improve insulin sensitivity estimation using the minimal model. *Am J Physiol* 253:E595–E602, 1987
- Cutfield WS, Bergman RN, Menon RK, Sperling MA: The modified minimal model: application to measurement of insulin sensitivity in children. *J Clin Endocrinol Metab* 70:1644–1650, 1990
- Bergman RN, Prager R, Volund A, Olefsky JM: Equivalence of the insulin sensitivity index in man derived by the minimal model method and the euglycemic glucose clamp. *J Clin Invest* 79:790–800, 1987
- Goran MI, Bergman RN, Gower BA: Influence of total vs. visceral fat on insulin action and secretion in African American and white children. *Obes Res* 9:423–431, 2001
- Legro RS, Finegood D, Dunaif A: A fasting glucose to insulin ratio is a useful measure of insulin sensitivity in women with polycystic ovary syndrome. *J Clin Endocrinol Metab* 83:2694–2698, 1998
- Uwaifo GI, Fallon EM, Chin J, Elberg J, Parikh SJ, Yanovski JA: Indices of insulin action, disposal, and secretion derived from fasting samples and clamps in normal glucose-tolerant black and white children. *Diabetes Care* 25:2081–2087, 2002
- Huang TT, Johnson MS, Goran MI: Development of a prediction equation for insulin sensitivity from anthropometry and fasting insulin in prepubertal and early pubertal children. *Diabetes Care* 25:1203–1210, 2002
- Cole TJ, Bellizzi MC, Flegal KM, Dietz WH: Establishing a standard definition for child overweight and obesity worldwide: international survey. *BMJ* 320:1240–1243, 2000
- Cole TJ, Freeman JV, Preece MA: British 1990 growth reference centiles for weight, height, body mass index and head circumference fitted by maximum penalized likelihood. *Stat Med* 17:407–429, 1998
- Wake M, Salmon L, Waters E, Wright M, Hesketh K: Parent-reported health status of overweight and obese Australian primary school children: a cross-sectional population survey. *Int J Obes Relat Metab Disord* 26:717–724, 2002
- World Health Organization. *Physical Status: the Use and Interpretation of Anthropometry: a report of a WHO Expert Committee*. Geneva, World Health Org., 1995
- Marshall WA, Tanner JM: Variations in pattern of pubertal changes in girls. *Arch Dis Child* 44:291–303, 1969
- Marshall WA, Tanner JM: Variations in the pattern of pubertal changes in boys. *Arch Dis Child* 45:13–23, 1970
- Bergman RN: Lilly lecture 1989: toward physiological understanding of glucose tolerance: minimal-model approach. *Diabetes* 38:1512–1527, 1989
- Matthews DR, Hosker JP, Rudenski AS, Naylor BA, Treacher DF, Turner RC: Homeostasis model assessment: insulin resistance and beta-cell function from fasting plasma glucose and insulin concentrations in man. *Diabetologia* 28:412–419, 1985
- Katz A, Nambi SS, Mather K, Baron AD, Follmann DA, Sullivan G, Quon MJ: Quantitative insulin sensitivity check index: a simple, accurate method for assessing insulin sensitivity in humans. *J Clin Endocrinol Metab* 85:2402–2410, 2000
- Ebbeling CB, Pawlak DB, Ludwig DS: Childhood obesity: public-health crisis, common sense cure. *Lancet* 360:473–482, 2002
- Silink M: Childhood diabetes: a global perspective. *Horm Res* 57 (Suppl. 1):S1–S5, 2002
- Silverstein JH, Rosenbloom AL: Type 2 diabetes in children. *Curr Diab Rep* 1:19–27, 2001
- Jones KL: Why test the children? Understanding insulin resistance, its complications, and its progression (Editorial). *Diabetes Care* 25:2350–2351, 2002
- Hoffman RP, Vicini P, Sivitz WI, Cobelli C: Pubertal adolescent male-female differences in insulin sensitivity and glucose effectiveness determined by the one compartment minimal model. *Pediatr Res* 48:384–388, 2000
- Gower BA, Granger WM, Franklin F, Shewchuk RM, Goran MI: Contribution of insulin secretion and clearance to glucose-induced insulin concentration in african-american and caucasian children. *J Clin Endocrinol Metab* 87:2218–2224, 2002
- Goran MI, Bergman RN, Cruz ML, Watanabe R: Insulin resistance and associated compensatory responses in african-american and Hispanic children. *Diabetes Care* 25:2184–2190, 2002
- Goran MI, Gower BA: Longitudinal study on pubertal insulin resistance. *Diabetes* 50:2444–2450, 2001
- Kirwan JP, Huston-Preasley L, Kalhan SC, Catalano PM: Clinically useful estimates of insulin sensitivity during pregnancy: validation studies in women with normal glucose tolerance and gestational diabetes mellitus. *Diabetes Care* 24:1602–1607, 2001
- Kanauchi M, Akai Y, Hashimoto T: Validation of simple indices to assess insulin sensitivity and pancreatic Beta-cell function in patients with renal dysfunction. *Nephron* 92:713–715, 2002
- Ferrara CM, Goldberg AP: Limited value of the homeostasis model assessment to predict insulin resistance in older men with impaired glucose tolerance. *Diabetes Care* 24:245–249, 2001
- Yildiz BO, Gedik O: Insulin resistance in polycystic ovary syndrome: hyperandrogenemia versus normoandrogenemia. *Eur J Obstet Gynecol Reprod Biol* 100:62–66, 2001
- Bonora E, Targher G, Alberiche M, Bonadonna RC, Saggiani F, Zenere MB, Monnauni T, Muggeo M: Homeostasis model assessment closely mirrors the glucose clamp technique in the assessment of insulin sensitivity: studies in subjects with various degrees of glucose tolerance and insulin sensitivity. *Diabetes Care* 23:57–63, 2000
- Chen H, Sullivan G, Yue LQ, Katz A, Quon MJ: QUICKI is a useful index of insulin sensitivity in subjects with hypertension. *Am J Physiol Endocrinol Metab* 284:E804–E812, 2003
- Abbasi F, Reaven GM: Evaluation of the quantitative insulin sensitivity check index as an estimate of insulin sensitivity in humans. *Metabolism* 51:235–237, 2002
- Guzzaloni G, Grugni G, Mazzilli G, Moro D, Morabito F: Comparison between beta-cell function and insulin resistance indexes in prepubertal and pubertal obese children. *Metabolism* 51:1011–1016, 2002
- Silfen ME, Manibo AM, McMahon DJ, Levine LS, Murphy AR, Oberfield SE: Comparison of simple measures of insulin sensitivity in young girls with premature adrenarche: the fasting glucose to insulin ratio may be a simple and useful measure. *J Clin Endocrinol Metab* 86:2863–2868, 2001
- Gower BA, Fernandez JR, Beasley TM, Shriver MD, Goran MI: Using genetic admixture to explain racial differences in insulin-related phenotypes. *Diabetes* 52:1047–1051, 2003
- Goran MI, Coronges K, Bergman RN,

- Cruz ML, Gower BA: Influence of family history of type 2 diabetes on insulin sensitivity in prepubertal children. *J Clin Endocrinol Metab* 88:192–195, 2003
41. Gower BA, Weinsier RL, Jordan JM, Hunter GR, Desmond R: Effects of weight loss on changes in insulin sensitivity and lipid concentrations in premenopausal African American and white women. *Am J Clin Nutr* 76:923–927, 2002
42. Cruz ML, Huang TT, Johnson MS, Gower BA, Goran MI: Insulin sensitivity and blood pressure in black and white children. *Hypertension* 40:18–22, 2002
43. Gower BA, Nagy TR, Goran MI: Visceral fat, insulin sensitivity, and lipids in prepubertal children. *Diabetes* 48:1515–1521, 1999
